# Supplementary material
Source: Elsevier journal article supplement (https://www.sciencedirect.com/science/article/pii/S1575181318301244)
Supplement: mmc1 [file S1575181318301244:mmc1.pdf]

## ANEXO. Material suplementario

### INSTRUMENTO DE RECOLECCIÓN DE DATOS

#### Parte I *(Nota: este formulario no requiere identificación)*

1.-Edad----- Sexo    F ☐    M ☐

2.-Años de graduado    ☐ <5años ☐ 5 a10 años    ☐ 10 a 15 años    ☐ >15 años

3.-Nivel actual    ☐ Interno ☐ Residente asistencial    ☐ Residente de postgrado

☐ Especialista

4.-Trabaja a nivel    ☐ Publico ☐ Privado ☐ Ambos

5.-Su hospital es de    ☐ Nivel I ☐ Nivel II ☐ Nivel III ☐ Nivel IV

6.- ¿Cuántos pacientes con neumonía usted evalúa por semana?

☐ 1a 7    ☐ 7 a 14    ☐ > 15

## Parte II. Caso Clínico.

### **Escenario 1. La posibilidad diagnóstica y estimación de la severidad**

Lactante mayor de 15 meses masculino con enfermedad de 3 días de evolución, se presenta con temperatura de 40°C, letárgico y vomitando. Al evaluarlo su frecuencia respiratoria es de 62, frecuencia cardíaca de 155 y SaO<sub>2</sub>aire ambiente 95%, signos de deshidratación moderada, tiraje intercostal leve bilateral sin afectación a la auscultación pulmonar.

Su estudio reveló, leucocitosis con neutrofilia (22.000 X mm<sup>3</sup>, 75% neutrófilos), la radiografía de tórax opacidad no homogénea, broncograma aéreo de la totalidad del lóbulo superior derecho, signo de silueta y desplazamiento apical de la cisura menor. La bioquímica sanguínea fue normal.

1.- ¿Cuál considera el elemento de mayor predicción de la presencia de neumonía? (uno o varios)

☐ La taquipnea ☐ La Deshidratación ☐ La taquicardia ☐ La fiebre

2.- ¿El elemento radiológico que lo hace sospechar de la ocupación del espacio alveolar es? (uno o varios)

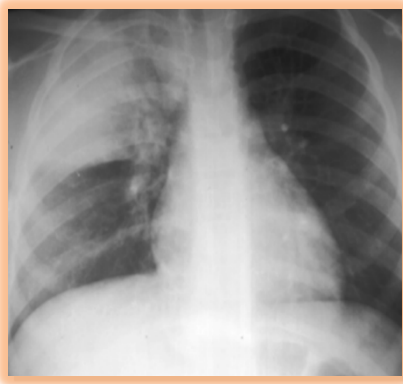

☐ El desplazamiento de la cisura ☐ El broncograma aéreo ☐ El signo de la silueta

3.- ¿Considera la severidad de este episodio? (uno o varios)

☐ Leve ☐ Moderado ☐ Severo

4.- ¿El hallazgo que le permitió estimar la severidad fue? (uno o varios)

- ☐ El conteo de glóbulos blancos ☐ La intolerancia oral y afectación del sensorio
- ☐ La imagen radiológica ☐ Los días previos de enfermedad

5.- ¿Considera necesario realizar otras pruebas de laboratorio?

- ☐ Sí ☐ No

6.- ¿Cuál o cuáles?

---

7.- ¿Cuál considera el elemento de mejor predicción del agente causal?(uno o varios)

- ☐ La edad del paciente ☐ La taquipnea ☐ La leucocitosis con neutrofilia ☐ El signo de la silueta

8.- ¿Cuál considera el probable agente etiológico? (uno o varios)

- ☐ *Mycoplasma pneumoniae* ☐ *Streptococcus pneumoniae* ☐ *Moraxella catarrhalis*
- ☐ *Streptococcus pyogenes*

## **Escenario 2. Decisiones terapéuticas y evolución.**

9.- ¿se puede tratar este niño de forma ambulatoria? ☐ Sí ☐ No

10.- ¿Cuál o cuáles antibióticos colocaría de forma empírica inicial? (uno o varios)

- ☐ Penicilina Cristalina ☐ Cefalosporinas de 3º generación ☐ Ampicilina
- ☐ Vancomicina ☐ Macrolidos

Otros-----

11.- A las 36-48 horas de haber iniciado el antibiótico ¿Qué o cuales elementos pudiera indicarle falla terapéutica? (uno o varios)

- ☐ Contaje de glóbulos blancos persistentemente elevados
- ☐ Falta de control de la temperatura
- ☐ Persistencia de la taquipnea ☐ Falta de mejoría radiológica

12.- ¿Cuántos días de antibiótico endovenoso le colocaría?

- ☐ 3 a 5 días ☐ 5 a 7 días ☐ > 7 días

13.- ¿se puede completar el tratamiento por vía oral de forma ambulatoria?

- ☐ Sí ☐ No

14.- ¿Cuál(es) consideraría las razones para pasar el antibiótico de la vía endovenosa o la vía oral?

- ☐ El conteo de glóbulos blancos se ha normalizado
- ☐ Mejoría de los signos respiratorios de afectación pulmonar
- ☐ Hay control sostenido de la temperatura corporal
- ☐ Ausencia de complicaciones

15.- ¿Cuál o cuáles antibióticos colocaría de forma ambulatoria para completar el tratamiento oral?

- ☐ Macrolidos   ☐ Aminopenicilinas   ☐ Cefalosporinas de 3<sup>o</sup> generacion oral
- ☐ Cefalosporinas de 2<sup>o</sup> generacion oral

16.- ¿Considera siempre necesaria la radiografía de control para decidir el egreso?

- ☐ Sí   ☐ No

17.- ¿Con que diagnósticos terminaría egresando a este niño?

---

---

---

---
